# Supplementary material for: Combinatory Treatment with miR-7-5p and Drug-Loaded Cubosomes Effectively Impairs Cancer Cells
Source: MDPI journal article supplement (doi:10.3390/ijms21145039), 2020-07-17
Supplement: s1 [file s1]

Table S1. Descriptive characteristics of the GB patients (n=23).

| Characteristic         |                        | GB patients |                     |
|------------------------|------------------------|-------------|---------------------|
| Age (years)            | Gender, n (%)          |             | Total, n (%)        |
|                        | Female                 | Male        |                     |
| <40                    | 2                      | 1           | 3 (13)              |
| 40-50                  | 2                      | 3           | 5 (22)              |
| 50-60                  | 1                      | 4           | 5 (22)              |
| >60                    | 5                      | 5           | 10 (43)             |
| Total                  | 10 (43)                | 13 (57)     | 23 (100)            |
| Age (years)            | 57 ±14<br>59 (32,78)   |             |                     |
| Mean ±SD               |                        |             |                     |
| Median (min., max.)    |                        |             |                     |
| Localization of GB     | Patient numbers, n (%) |             |                     |
| Frontal lobe           |                        |             |                     |
| Temporal lobe          |                        |             |                     |
| Parietal lobe          |                        |             |                     |
| Occipital lobe         |                        |             |                     |
| Primary glioblastoma   | n (%)                  | Mean ±SD    | Median (min., max.) |
| Secondary glioblastoma | 19 (82)                | 61 ±12      | 65 (33,78)          |
|                        | 4 (17)                 | 42 ±13      | 38 (32,60)          |
